# Supplementary material for: Effectiveness of clinical training on improving essential newborn care practices in Bossaso, Somalia: a pre and postintervention study
Source: PubMed Central journal article supplement (PMC7222459; doi:10.1186/s12887-020-02120-x), 2020-05-13
Supplement: 12887_2020_2120_MOESM1_ESM.pdf [file 12887_2020_2120_MOESM1_ESM.pdf]

Supplemental 1

| <b>Newborn Kit: Medical Supplies, Equipment's, and Drugs</b> |                                                                                                             |
|--------------------------------------------------------------|-------------------------------------------------------------------------------------------------------------|
| 1                                                            | blanket, baby, 50 x 75 cm, polyester fleece                                                                 |
| 2                                                            | blood glucose meter, range 40-600 mg/dl, LCD display 35 x 31.5 mm, 360 memory positions (BG-102)            |
| 3                                                            | blood lancets, sterile, disposable                                                                          |
| 4                                                            | blood glucose test strips (BS-101), for use with BG-102 glucose meter                                       |
| 5                                                            | cap, newborn                                                                                                |
| 6                                                            | doppler apparatus, pockettype, LCD display, FHR display, interchangeable 2 Mhz probe (Sonoline B)           |
| 7                                                            | ultrasound gel, 250 ml                                                                                      |
| 8                                                            | gloves, examination, latex, size medium, pre-powdered, disposable, non-sterile                              |
| 9                                                            | light, examination, floortype, flexible neck, 220V lamp (bulb not included), on castors                     |
| 11                                                           | suction device, penguin-model, silicone, autoclavable (Laerdal 986000)                                      |
| 12                                                           | needle, hypodermic, Luer, 25 G x 5/8" (0.50 x 16 mm), sterile, disposable (orange)                          |
| 13                                                           | respiration rate timer, for ARI programmes, with batteries (S                                               |
| 14                                                           | resuscitation bag, with mask no. 0 and 1 (Laerdal NeoNatalie Resuscitator 846030)                           |
| 15                                                           | scalp vein infusion set 25 G (0.50 mm), sterile, disposable                                                 |
| 16                                                           | syringe, hypodermic, Luer, 3-part, 1 ml, sterile, disposable                                                |
| 17                                                           | table for baby reanimation with overhead heater, mattress, skin/air temperature control, trolley (RHW2102A) |
| 18                                                           | thermometer, electronic, digital display (Celsius)                                                          |
| 19                                                           | towel, 60 x 80 cm, cotton                                                                                   |
| 20                                                           | urine teststrips, 10 detections                                                                             |
| 21                                                           | RPR slide-test, 100 tests (keep cool 2-8°C)                                                                 |
| 22                                                           | weighing scale, baby, electronic, digital, 20 kg, graduation 5 g                                            |
| 24                                                           | ampicillin 500 mg                                                                                           |
| 25                                                           | cefotaxime sodium 1 g                                                                                       |
| 26                                                           | ceftriaxone 250 mg                                                                                          |
| 27                                                           | gentamycin sulphate 40 mg/ml, 2 ml                                                                          |
| 28                                                           | vitamin K-1 (phytomenadione) 1 mg/ml, 1 ml (oily)                                                           |
| 29                                                           | kit, emergency reproductive health, clean delivery, A                                                       |
| 30                                                           | kit, emergency reproductive health, clinical delivery assistance, reusable equipment                        |
| 31                                                           | kit, emergency reproductive health, clinical delivery assistance, drugs and disposable equipment )          |
| 32                                                           | kit, emergency reproductive health, vacuum extraction delivery (HM Healthcare model)                        |
