# Supplementary material for: Effectiveness of clinical training on improving essential newborn care practices in Bossaso, Somalia: a pre and postintervention study
Source: Springer Nature journal article supplement (doi:10.1186/s12887-020-02120-x), 2020-05-13
Supplement: MOESM2 [file 17979540]

|                                                                                                                                                                                                                                                                                                                                                                                                                                                                                                                                                                                                                                                                                                                                                                  |                                                                                                                                                                                                                                                                                                                                                                                                                                                                                                                                                                                                                                                                                               |
|------------------------------------------------------------------------------------------------------------------------------------------------------------------------------------------------------------------------------------------------------------------------------------------------------------------------------------------------------------------------------------------------------------------------------------------------------------------------------------------------------------------------------------------------------------------------------------------------------------------------------------------------------------------------------------------------------------------------------------------------------------------|-----------------------------------------------------------------------------------------------------------------------------------------------------------------------------------------------------------------------------------------------------------------------------------------------------------------------------------------------------------------------------------------------------------------------------------------------------------------------------------------------------------------------------------------------------------------------------------------------------------------------------------------------------------------------------------------------|
| <p><b>Tilmaamaha:</b><br/>Buuxi diiwaanka hal-layn cunuggiiba. Jawaabaha macquulka ah ee kolom kasta waxay ku taxan yihiin hoos. Haddii dhibaatooyin jiraan, fadlan kasoo bixi hal-jawaab - haddii cunugga ama hooyadu ay leeyihiin dhibaatooyin fara-badan, qor dhibaata ugu halista badan.</p> <p>Haddii mataano yihiin: mataan kasta waa in laga-buuxiyaa laynkiisa diiwaanka. Kolomka saddexaad, calaamadi Maxsuulka mataankaas (tusaale ahaan, mid ka-mid ah mataanaha wuxuu noqon kara "mataan nolol ku dhashay" kan-kalena wuxuu noqon karaa "mataan dhicis ah"). Kaliya buuxi dhibaatooyinka hooyada iyo natijada hooyada hal-mar (waxaad ku-qori kartaa "mataano" kolomka dhibaatooyinka hooyada, mataanka kalena ku-qor kolomka natijada hooyada).</p> | <p><b>Instructions:</b><br/>Fill out the register with one line for each baby. The possible responses to each column are listed at the bottom. For complications, please only pick one response- if the baby or mother has multiple complications, put down the most serious complication.</p> <p>For twins: each twin should have its own line in the register. For the third column, mark the outcome for that specific twin (for example, one twin could be "twin livebirth" and the other could be "twin stillbirth"). Only fill out the maternal complication and maternal outcome once (you can write "twin" in the maternal complication and outcome columns for the second twin).</p> |
|------------------------------------------------------------------------------------------------------------------------------------------------------------------------------------------------------------------------------------------------------------------------------------------------------------------------------------------------------------------------------------------------------------------------------------------------------------------------------------------------------------------------------------------------------------------------------------------------------------------------------------------------------------------------------------------------------------------------------------------------------------------|-----------------------------------------------------------------------------------------------------------------------------------------------------------------------------------------------------------------------------------------------------------------------------------------------------------------------------------------------------------------------------------------------------------------------------------------------------------------------------------------------------------------------------------------------------------------------------------------------------------------------------------------------------------------------------------------------|

| Qeexidda. Dhibaatooyinka Murjuca      |                                                                                                                                                                                                               | Definitions. Newborn Complications |                                                                                                                                                                                            |
|---------------------------------------|---------------------------------------------------------------------------------------------------------------------------------------------------------------------------------------------------------------|------------------------------------|--------------------------------------------------------------------------------------------------------------------------------------------------------------------------------------------|
| <b>Jirrooyin muuqda</b>               | Ma-lahan dhaqdhaqaaq<br>Miyir la' (aan miyir lahayn)<br>Soo-maray gariir (lahaan jiray gariir)<br>Waxba Nuugayn<br>Dhiig-bax aad u-daran<br>Nasista oo soo-buuran                                             | <b>Critical Illness</b>            | No movement<br>Unconscious<br>History of convulsions<br>Unable to feed<br>Severe bleeding<br>Bulging fontanelle                                                                            |
| <b>Ikfashin / Caabuuq aad u-daran</b> | Qando (heer-kul ka badan ama le'eg 38 darajo)<br>Heer-kulka jirka oo yaraada (heer-kul ka-yar 35 darajo)<br>Nuugidda ama cabbidda murjuca oo xun<br>Dhaq-dhaqaaq yaraaday<br>Feeraha oo qaad-qadma (neef-gur) | <b>Severe Infection</b>            | Fever (temperature greater than or equal to 38 degrees Celsius)<br>Hypothermia (temperature less than 35.5 degrees Celsius)<br>Poor feeding<br>Reduced movement<br>Severe chest in-drawing |
| <b>Neefsi degdeg (neef-gur)</b>       | Tirada Neefsiiga oo ka-wayn 60 neefsi daqiiqaddiiba                                                                                                                                                           | <b>Isolated Fast Breathing</b>     | Respiratory rate > 60 breaths per minute                                                                                                                                                   |
| <b>Ku-dhashay naqaskoo ku dhaggan</b> | Murjucu ma-bilaabin neefsi dabiici ah                                                                                                                                                                         | <b>Birth Asphyxia</b>              | Newborn does not start spontaneous breathing                                                                                                                                               |
| <b>Dhicis</b>                         | Ilmo ku-dhashay ka-hor intaanu dhammaysan 37 asbuuc                                                                                                                                                           | <b>Prematurity</b>                 | Babies born before completed 37 weeks of gestation                                                                                                                                         |
| <b>Cagaarshow</b>                     | Midabka maqaarka iyo indhaha oo jaalle isu baddala.                                                                                                                                                           | <b>Jaundice</b>                    | Yellowish discoloration of the skin and the whites of the eyes                                                                                                                             |

| Qeexidda: Dhibaatooyinka Hooyada                   |                                                                                                                                                                               | Definitions: Maternal Complications     |                                                                                                                                                                      |
|----------------------------------------------------|-------------------------------------------------------------------------------------------------------------------------------------------------------------------------------|-----------------------------------------|----------------------------------------------------------------------------------------------------------------------------------------------------------------------|
| <b>Dhiig-bax Dhalmada ka-dib</b>                   | Waxaa lagu qeexaa marka hooyadu lumiso wax ka-badan 500 ml ama 1,000 ml oo dhiig ah inta lagu jiro 24ka saac ee ugu horreeya dhalmada ka-dib.                                 | <b>Postpartum Hemorrhage (Bleeding)</b> | Defined as the loss of more than 500 ml or 1,000 ml of blood within the first 24 hours following childbirth                                                          |
| <b>Foosha oo dheeraata</b>                         | Waa Xaalado badan oo ay ka-mid yihiin foosha oo qaadata wax ka-badan 12 saacadood, miskaha hooyada iyo uurjiifka oon is le-kayn ama soo beegnaanta cunugga oo aan caadi ahayn | <b>Obstructed/ Prolonged Labour</b>     | Broad range of conditions including labour lasting more than 12 hours, fetopelvic disproportion or abnormal fetal presentation                                       |
| <b>Bare-eclampsia/ Eklamsia</b>                    | Bare-eclampsia/ Eklamsia waa mushkilad uurka la xiriirta oo lagu garto Cadaadiska Dhiiga oo sarreeya. Calaadaha kale waxaa ka-mid ah Barar iyo kaadida oo borotiin soo raaco. | <b>Pre-eclampsia/ eclampsia</b>         | Preeclampsia is a complication of pregnancy that is associated with high blood pressure. Other signs and symptoms include swelling (edema) and protein in the urine. |
| <b>Ikfashin aad u-daran/ Jirrooyin aad u-daran</b> | Qandho/Xummad: (Heer-kulka jirka oo ka-sarreeya 37.5 darajo), Qaybta hoose ee caloosha oo aad u-xanuunta, Dhiigga ka-yimaada xubinta taranka oo ura ama siifad xun yeesha     | <b>Severe Infection/ Severe illness</b> | Fever (temperature >37.5 degree centigrade), severe lower abdominal pain, foul smelling vaginal discharge                                                            |
